# Supplementary material
Source: Royal Society of Chemistry journal article supplement (doi:10.1039/d5fo03902a)

## **Additional File 2: Full copies (uncropped) of all western blot's images**

### **Akkermansia muciniphila alleviates diabetic cognitive impairment by inhibiting brain NLRP3**

#### **inflammasome activation and ameliorating hippocampal synaptic defects**

Yage Du <sup>,a,b</sup> Yu An <sup>,c</sup> Zhaoming Cao <sup>,a</sup> Guangyi Xu <sup>,a</sup> Ming Chu <sup>,d</sup> Yanhui Lu <sup>\*,a</sup>

a School of Nursing, Peking University, Beijing 100191, China;

b College of Medicine, Henan Polytechnic University, Jiaozuo 454000, China;

c Medical Research Center, Beijing Institute of Respiratory Medicine and Beijing Chao-Yang Hospital, Capital Medical University, 100020, Beijing, China;

d Department of Immunology, School of Basic Medical Sciences, Peking University, NHC Key Laboratory of Medical Immunology (Peking University), Beijing 100191, China.

\* Corresponding authors:

Dr. Yanhui Lu, E-mail: [luyanhui@bjmu.edu.cn](mailto:luyanhui@bjmu.edu.cn)

**Fig. 2**

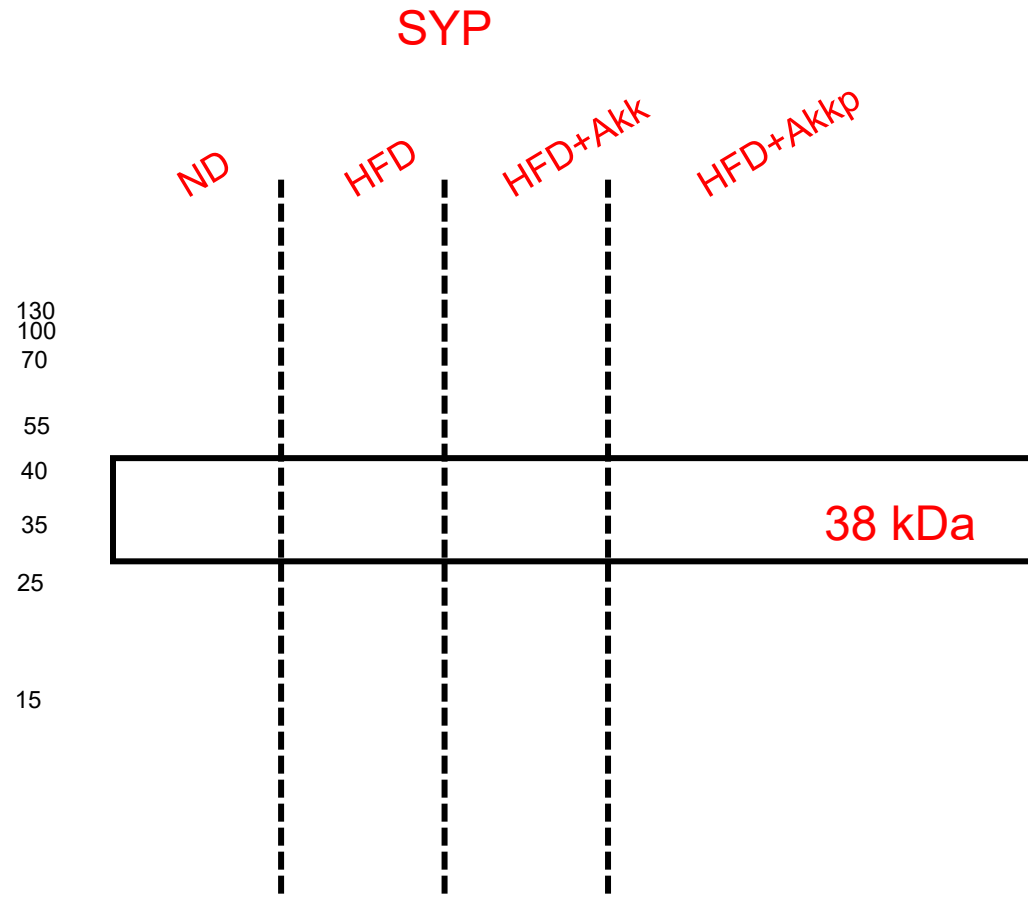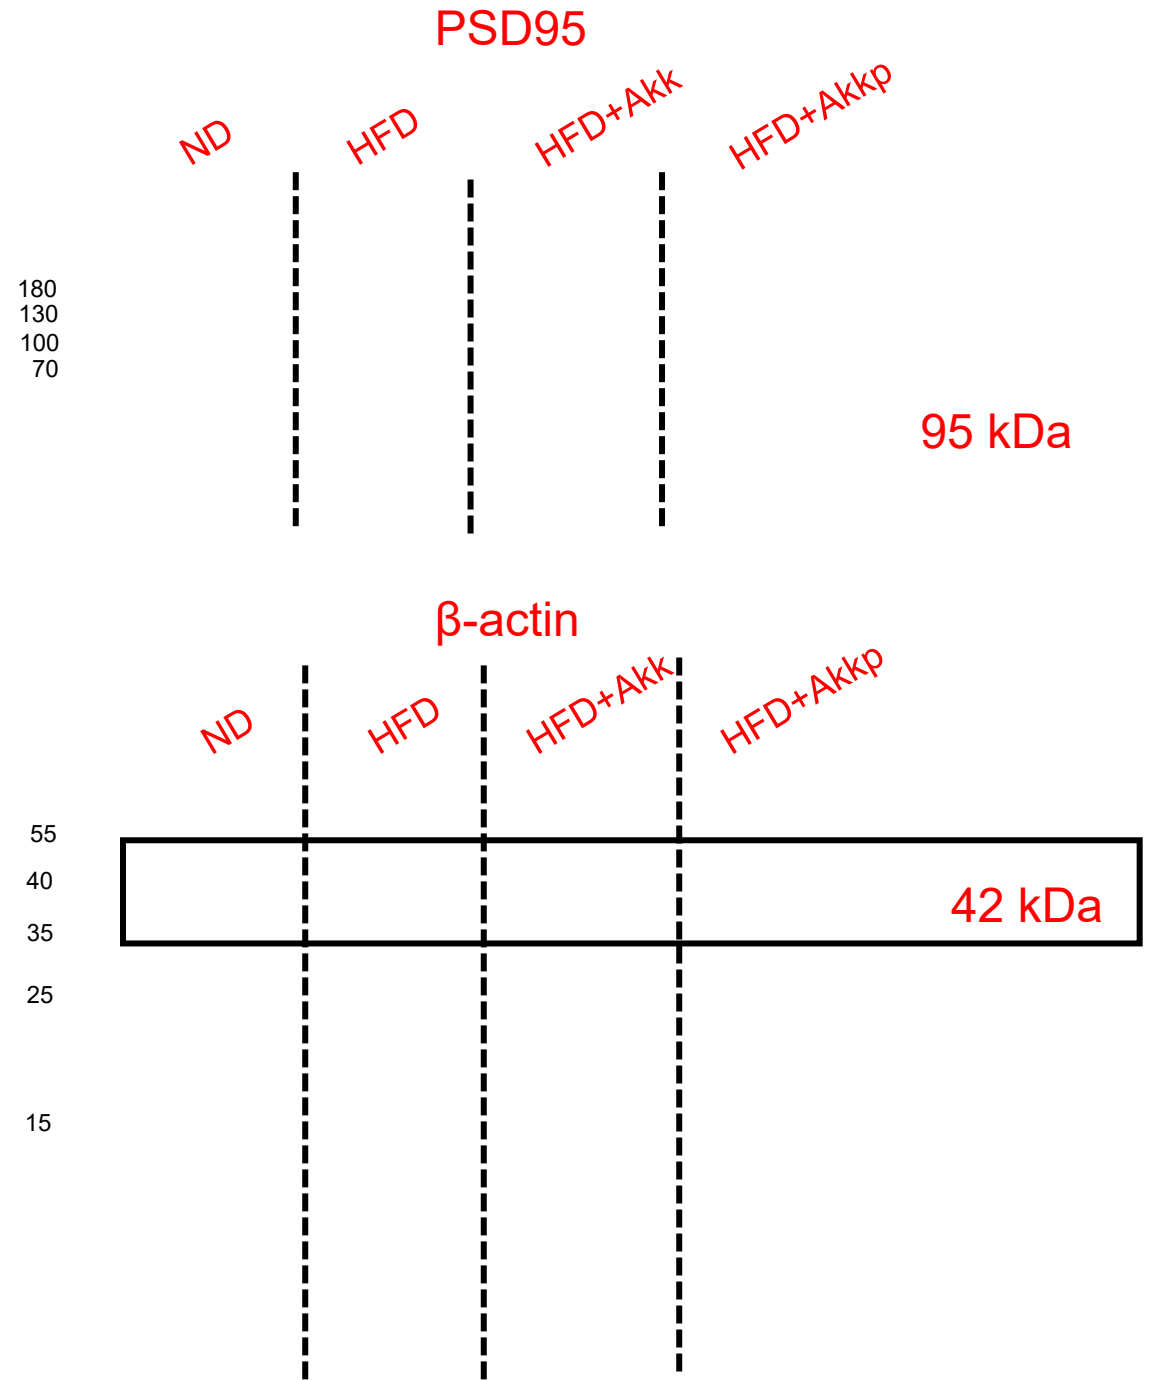

**Fig. 3**

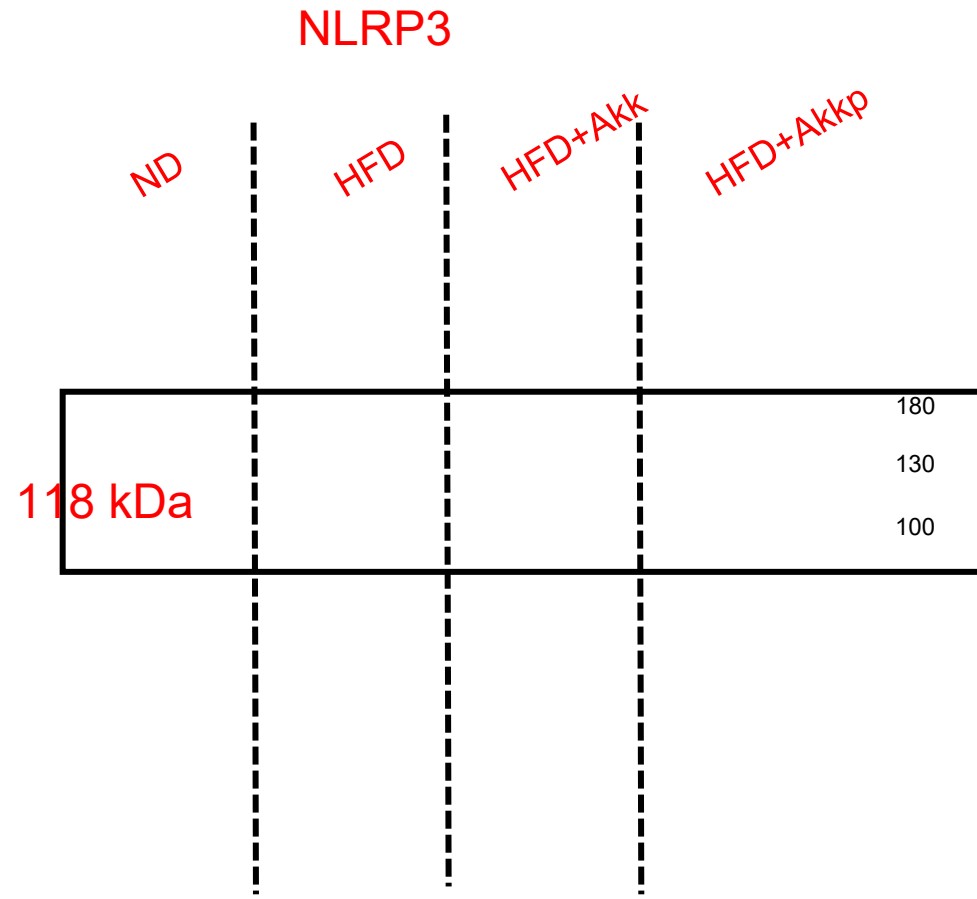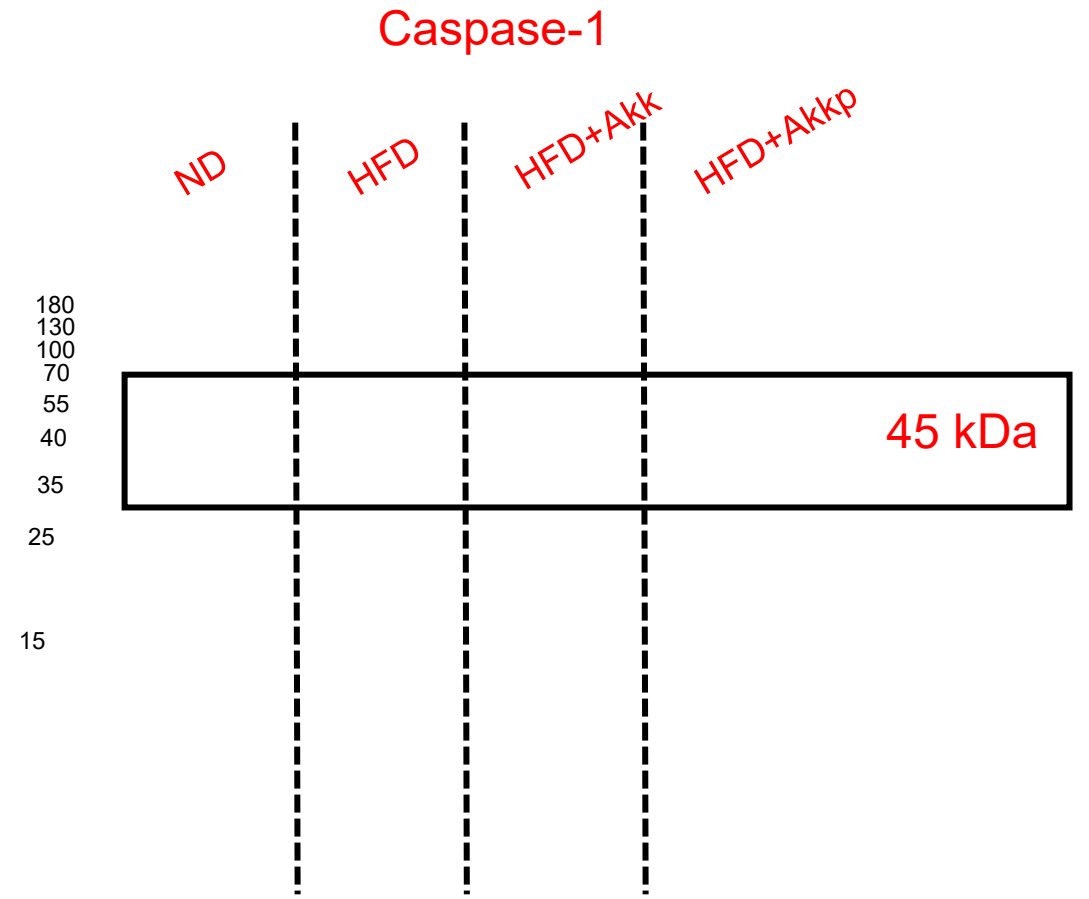

**Fig. 3**

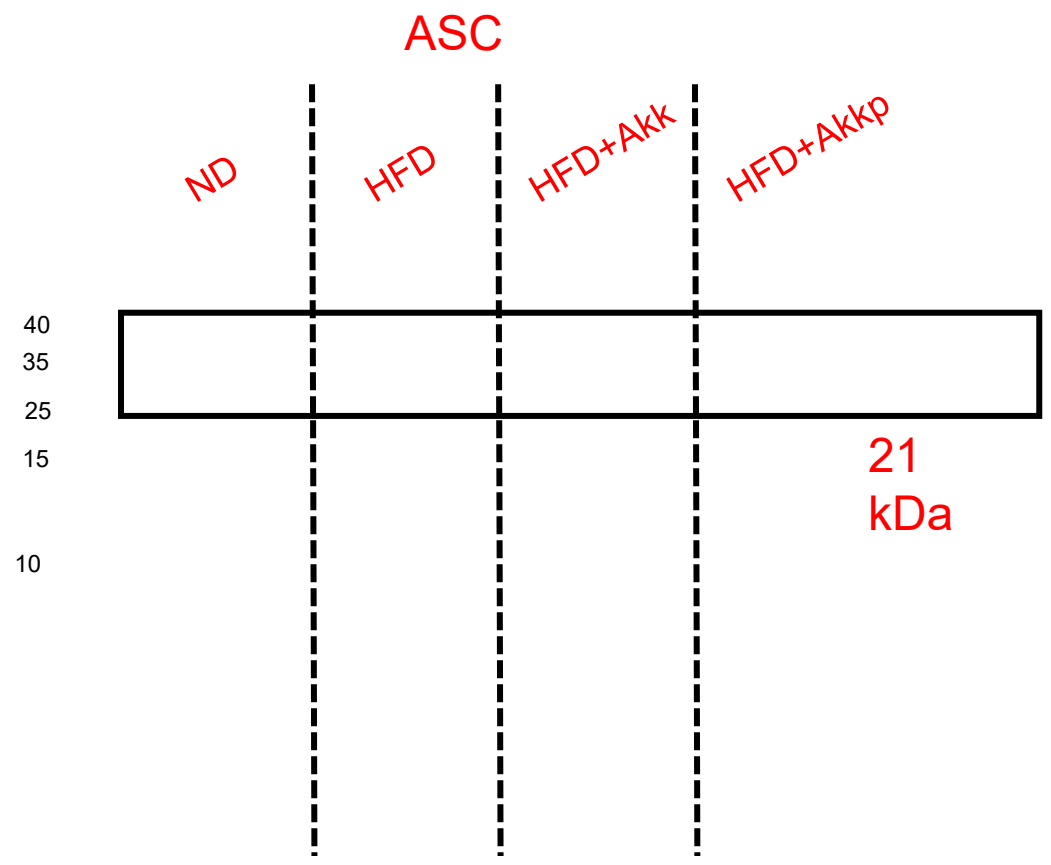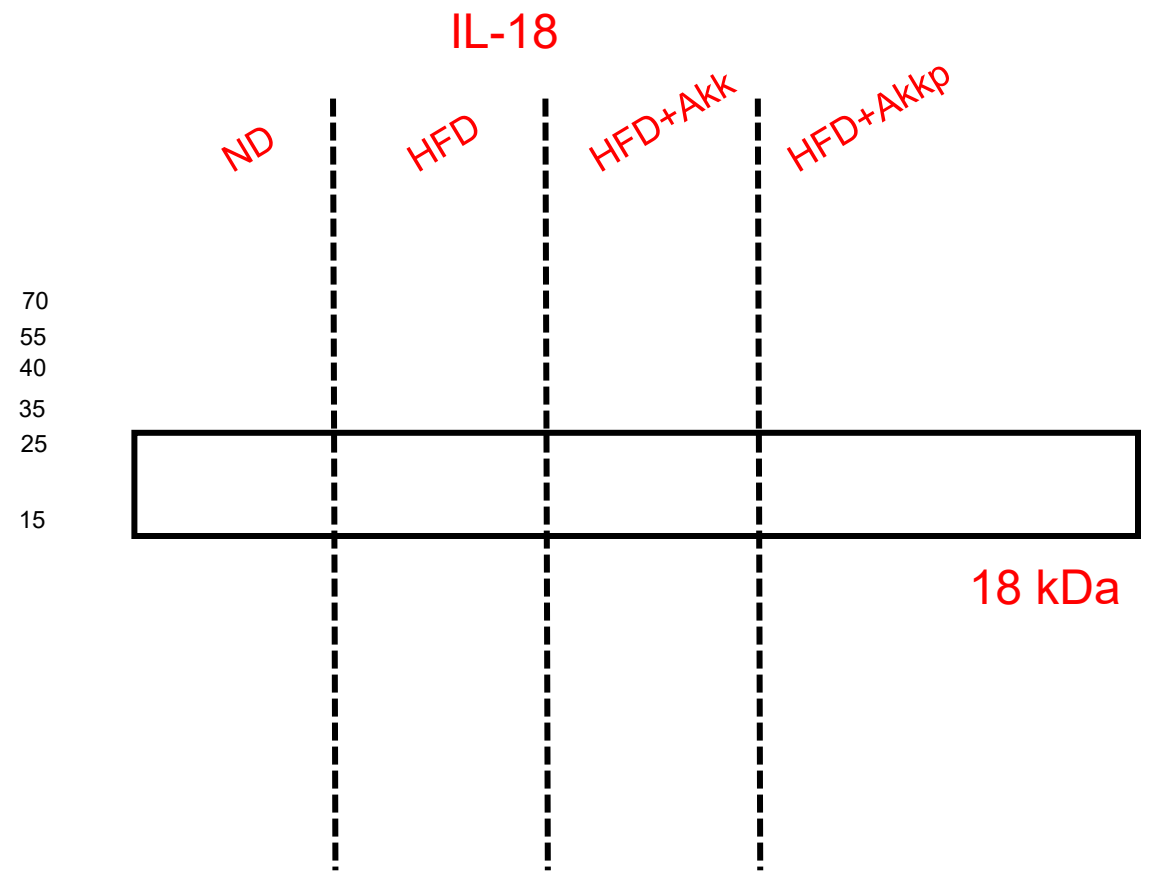

**Fig. 3**

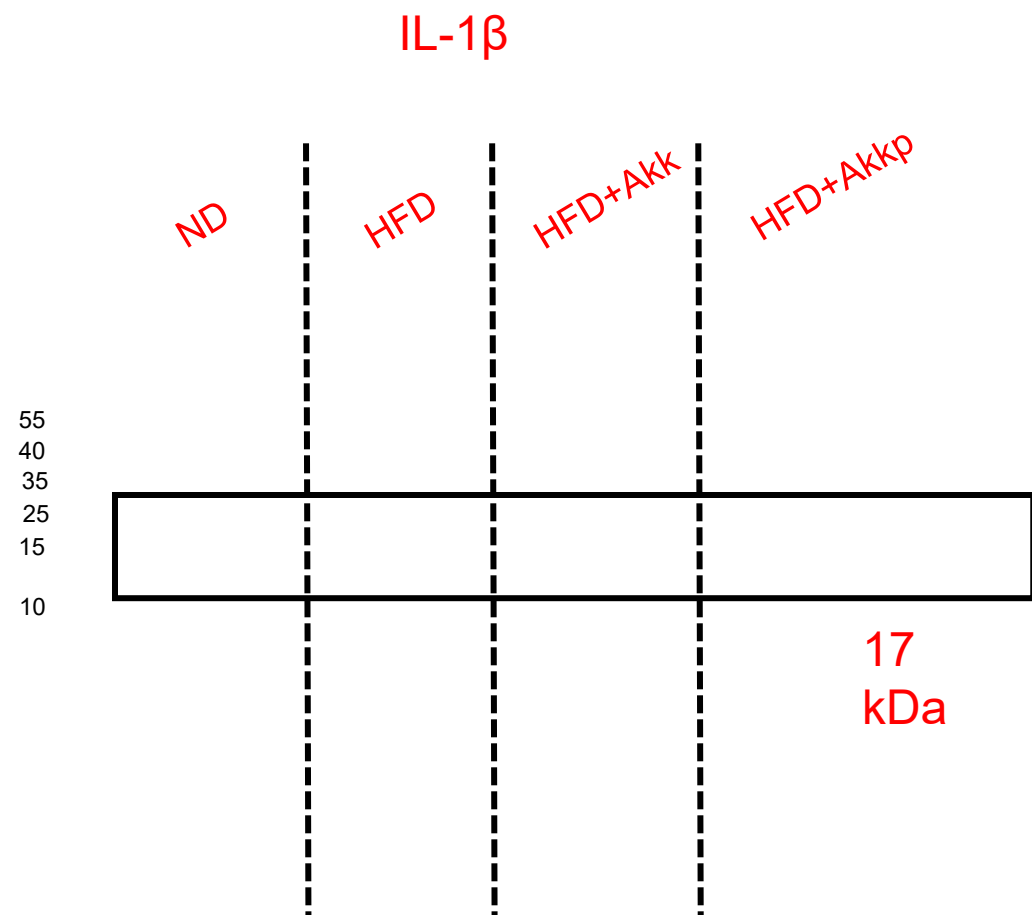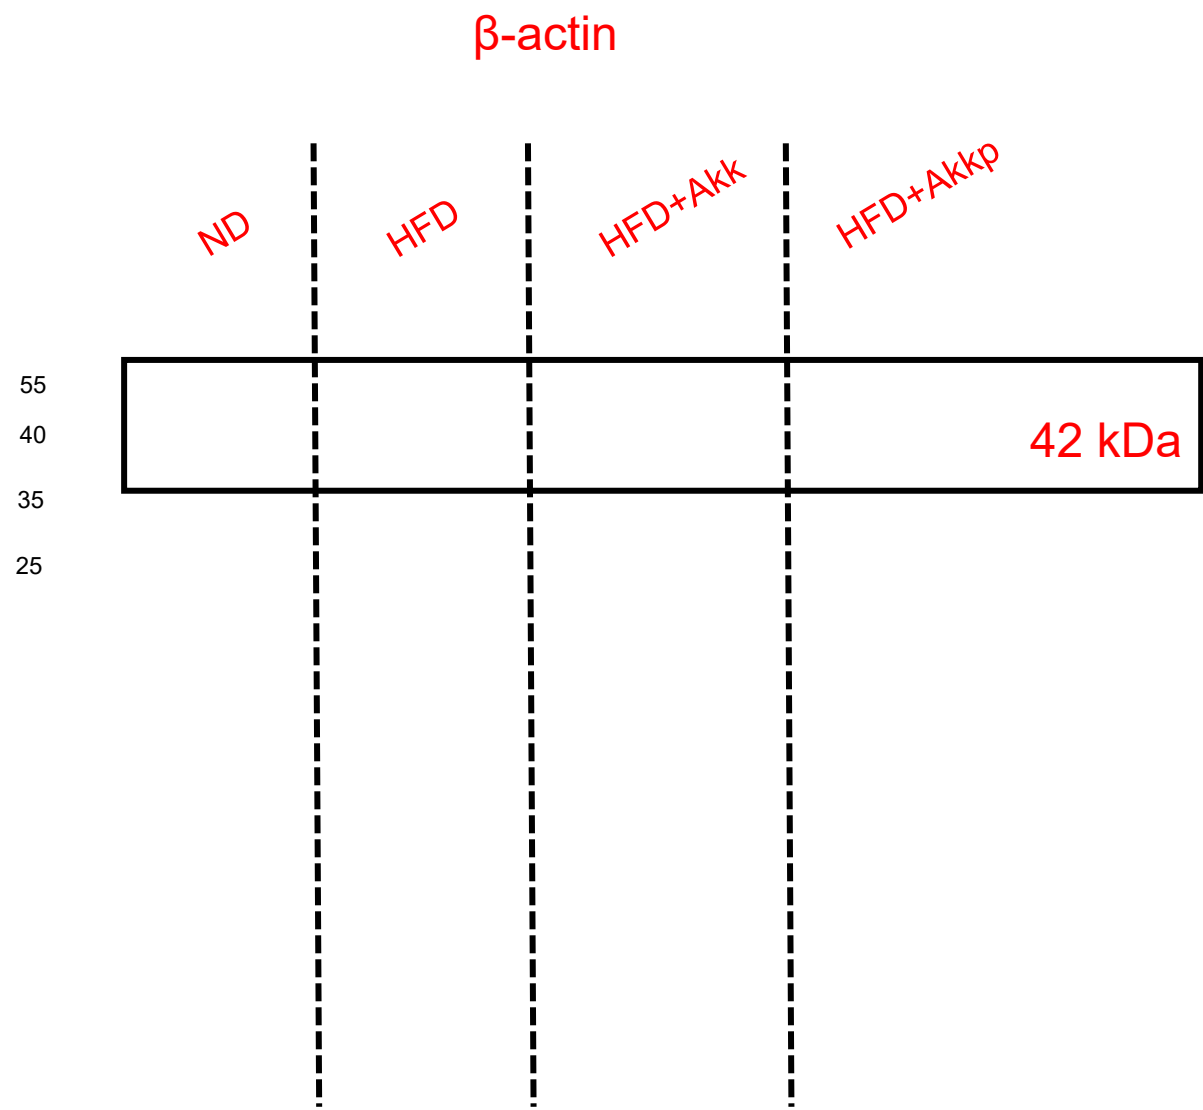

**Fig. 5**

**SYP**

**PSD95**

**$\beta$ -actin**

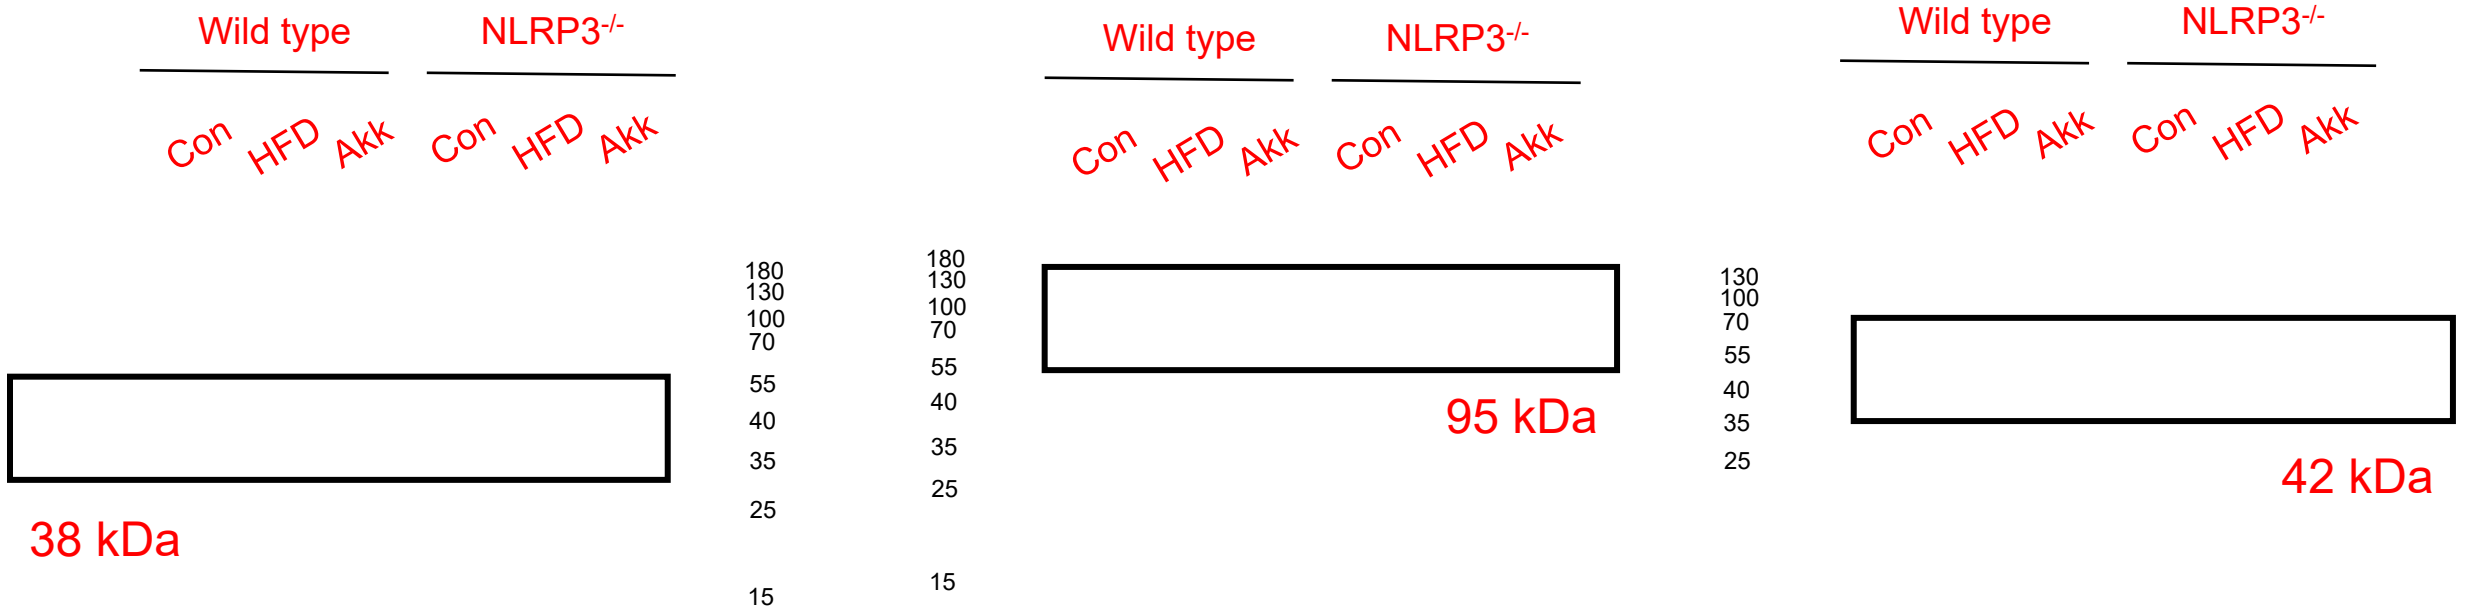

**Fig. 5**

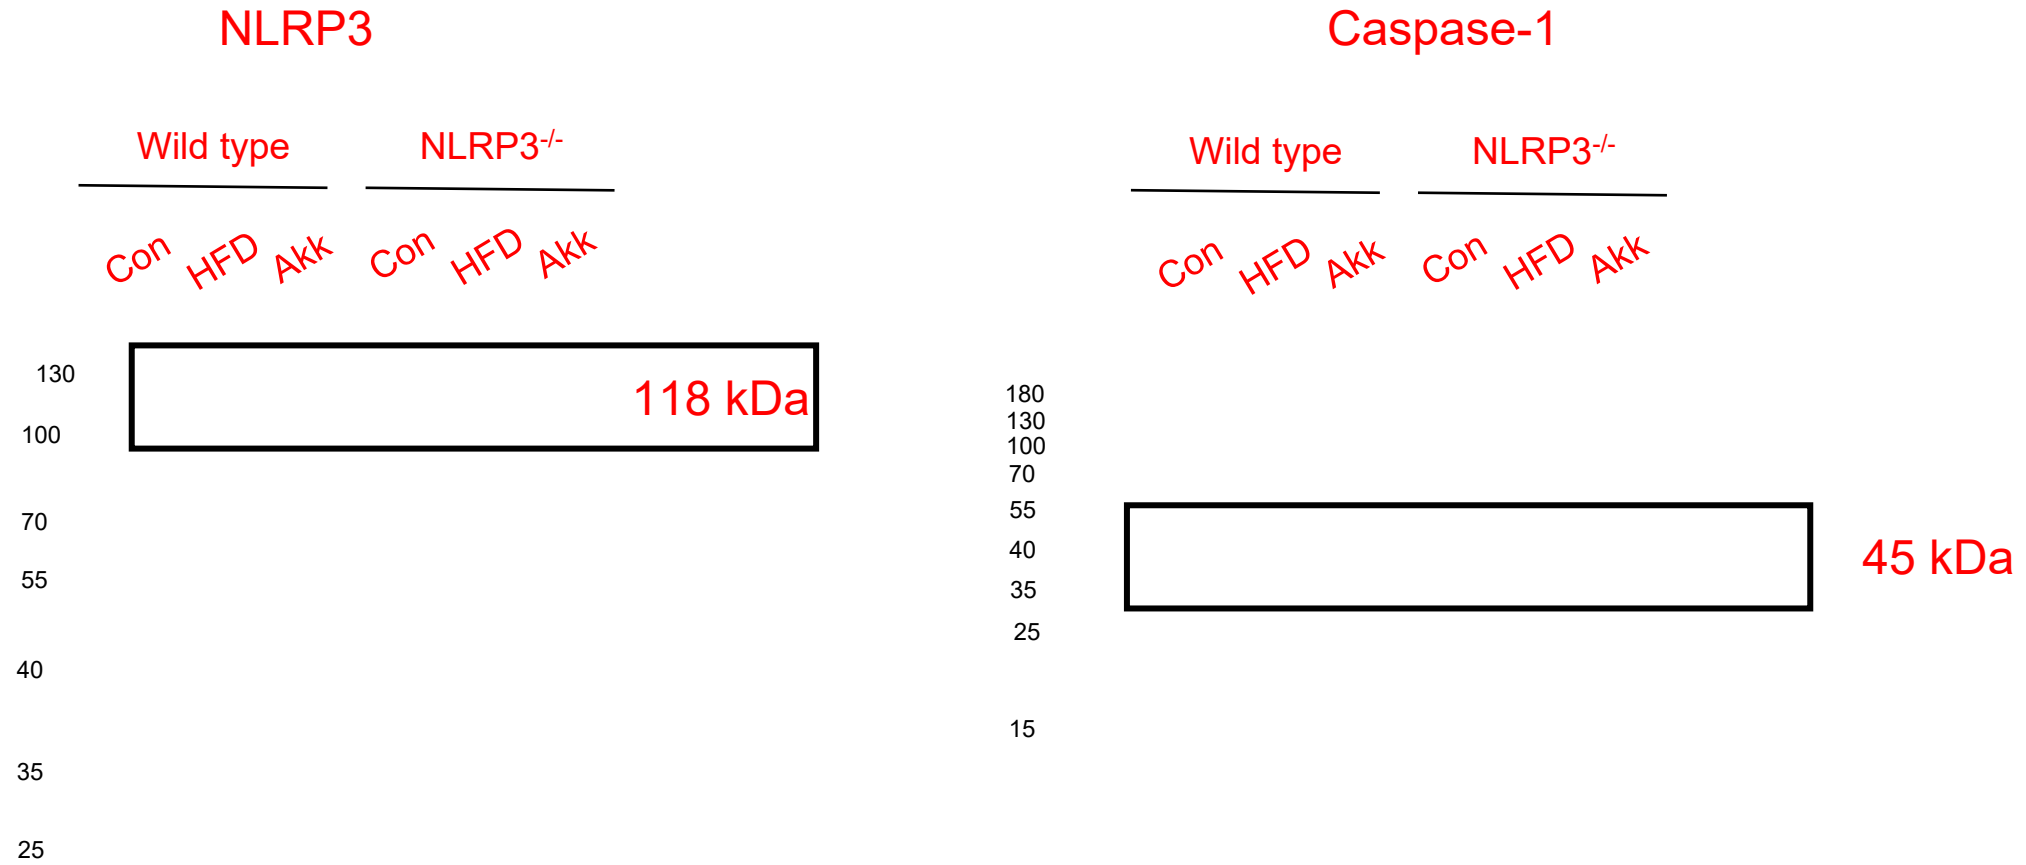

**Fig. 5**

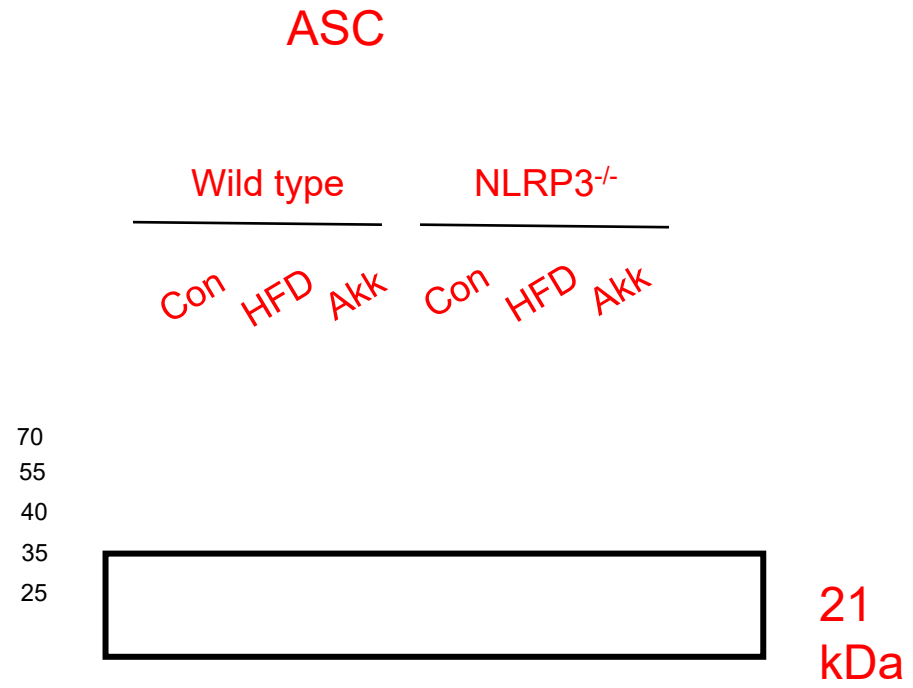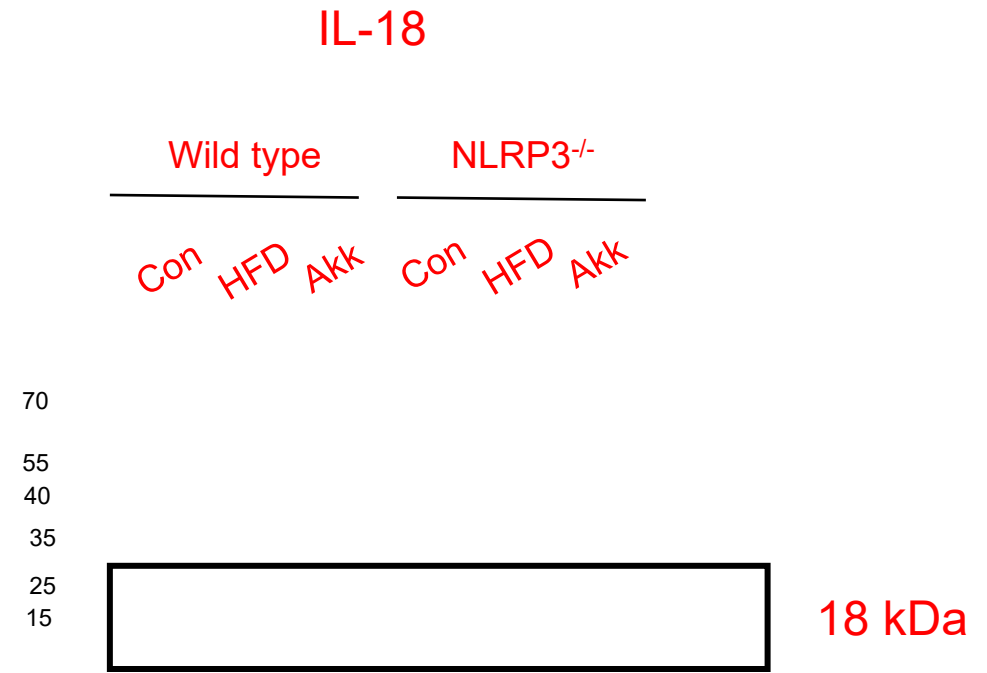

**Fig. 5**

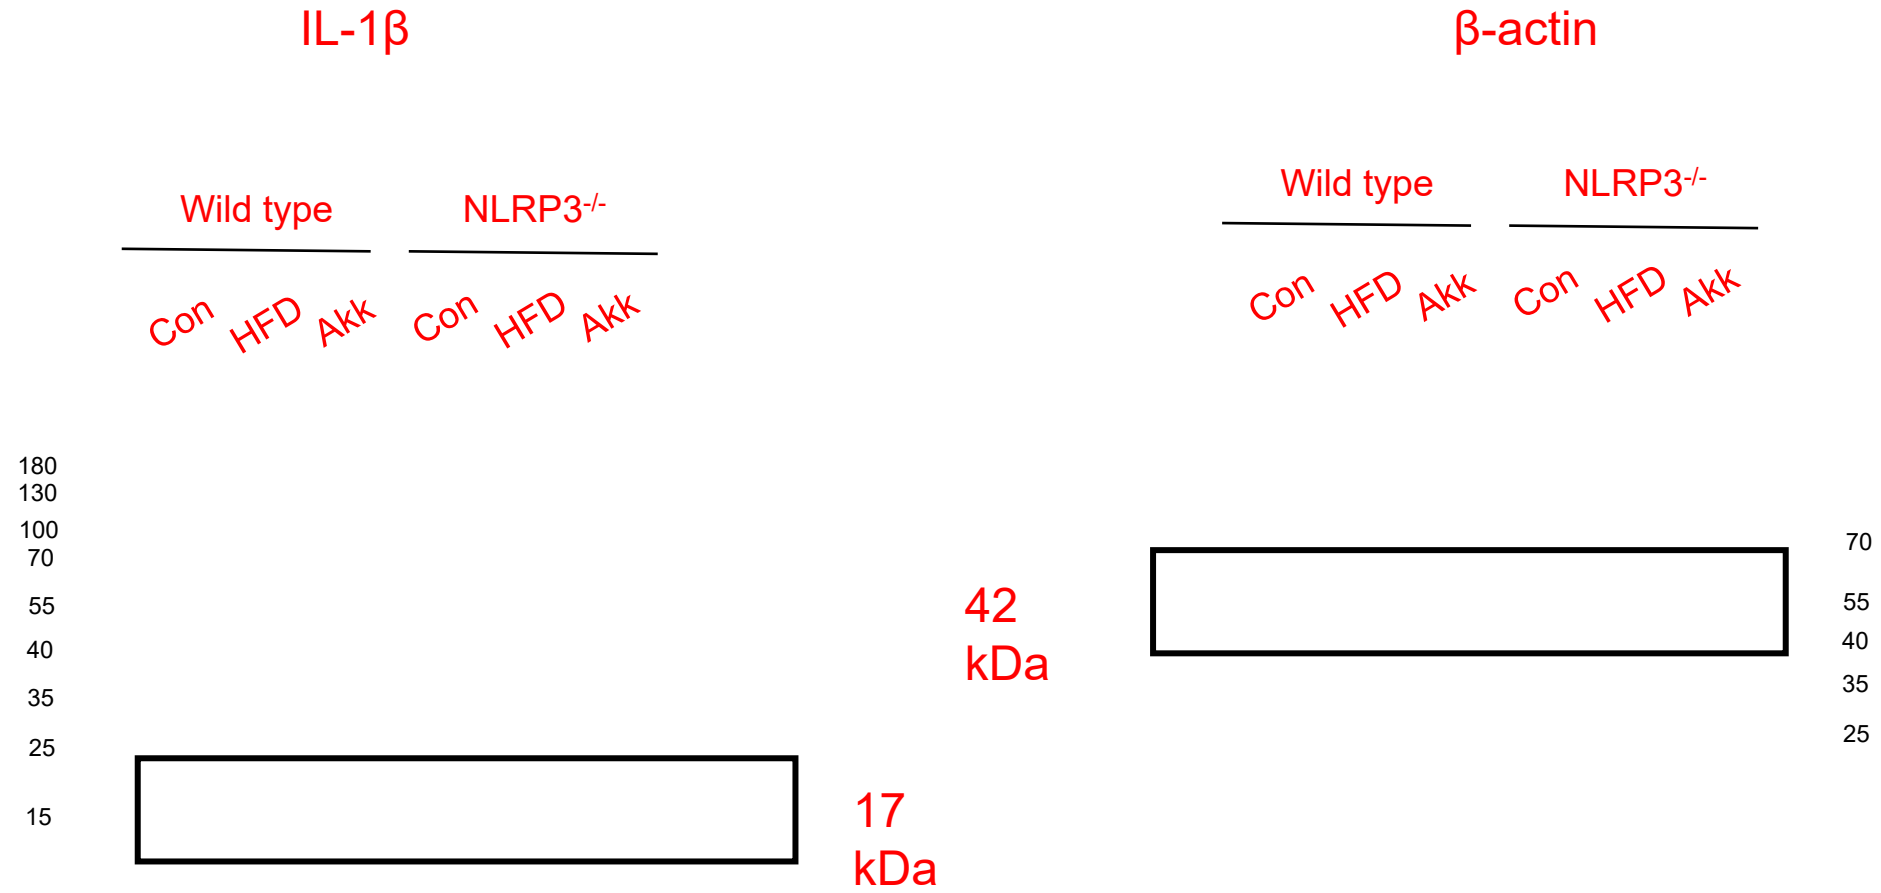

Supplement: d5fo03902a2.pdf [file d5fo03902a2.pdf]
